# Supplementary material
Source: PubMed Central journal article supplement (PMC6445693)
Supplement: NIHMS1517327-supplement-3.pdf [file NIHMS1517327-supplement-3.pdf]

**Supplementary Table 1**

| TMA location | Metastasis                      | Time to metastasis (months) | Follow-up time w/o metastasis (months) | TMA Samples used for c-MET and CXCR expression |
|--------------|---------------------------------|-----------------------------|----------------------------------------|------------------------------------------------|
| C1R1         | no                              |                             | 180                                    | No                                             |
| C1R2         | no                              |                             | 84                                     | No                                             |
| C1R3         | liver                           | 13                          |                                        | Yes                                            |
| C1R4         | liver                           | 24                          |                                        | Yes                                            |
| C1R5         | no                              |                             | 52                                     | Yes                                            |
| C1R6         | no                              |                             | 144                                    | Yes                                            |
| C1R7         | liver, lung, bone, lymph        | 60                          |                                        | Yes                                            |
| C1R8         | liver                           | 72                          |                                        | Yes                                            |
| C2R1         | no                              |                             | 50                                     | Yes                                            |
| C2R2         | no                              |                             | 132                                    | No                                             |
| C2R3         | liver                           | 20                          |                                        | No                                             |
| C2R4         | liver, lung, subcutaneous       | 26                          |                                        | Yes                                            |
| C2R5         | no                              |                             | 48                                     | No                                             |
| C2R6         | no                              |                             | 60                                     | Yes                                            |
| C2R7         | liver, lung, subcut.            | 22                          |                                        | Yes                                            |
| C2R8         | liver                           | 30                          |                                        | Yes                                            |
| C3R1         | no                              |                             | 36                                     | Yes                                            |
| C3R2         | no                              |                             | 108                                    | Yes                                            |
| C3R3         | liver, orbital mass o.s., bones | 36                          |                                        | Yes                                            |
| C3R4         | liver, lung                     | 0                           |                                        | Yes                                            |
| C3R5         | no                              |                             | 37                                     | Yes                                            |
| C3R6         | no                              |                             | 72                                     | No                                             |
| C3R7         | liver                           | 27                          |                                        | Yes                                            |
| C3R8         | liver                           | 0                           |                                        | Yes                                            |
| C4R1         | no                              |                             | 48                                     | Yes                                            |
| C4R2         | no                              |                             | 82                                     | Yes                                            |
| C4R3         | liver, bone                     | 14                          |                                        | Yes                                            |
| C4R4         | liver                           | 5                           |                                        | Yes                                            |
| C4R5         | no                              |                             | 46                                     | Yes                                            |
| C4R6         | no                              |                             | 48                                     | Yes                                            |
| C4R7         | local, liver, lung              | 10                          |                                        | Yes                                            |
| C4R8         | liver                           | 44                          |                                        | Yes                                            |
| C5R1         | no                              |                             | 46                                     | Yes                                            |
| C5R2         | no                              |                             | 120                                    | No                                             |
| C5R3         | liver                           | 60                          |                                        | Yes                                            |
| C5R4         | lung, liver, orbit              | 72                          |                                        | Yes                                            |
| C5R5         | no                              |                             | 36                                     | Yes                                            |
| C5R6         | no                              |                             | 120                                    | Yes                                            |
| C5R7         | liver                           | 60                          |                                        | Yes                                            |
| C5R8         | liver                           | 19                          |                                        | No                                             |

without metastasis patients - alive  
 metastasis patients - alive  
 metastasis patients - deceased
