# Supplementary material
Source: PubMed Central journal article supplement (PMC6445693)
Supplement: NIHMS1517327-supplement-4.pdf [file NIHMS1517327-supplement-4.pdf]

## Supplementary Table 2

|    | Overlapped genes | Pathway analysis | p value in survival analysis | 22 Genes         |              |
|----|------------------|------------------|------------------------------|------------------|--------------|
| 1  | ZC3H7A           | FOS              | FOS                          | 0.296            | MX1          |
| 2  | WWP1             | GJA1             | GJA1                         | 0.236            | PLOD3        |
| 3  | WIP1             | CD55             | CD55                         | 0.198            | <b>MET</b>   |
| 4  | WBP1L            | COL4A1           | COL4A1                       | 0.178            | PSMB9        |
| 5  | WARS             | COL4A2           | COL4A2                       | 0.178            | TIMP1        |
| 6  | VMP1             | SAMD9L           | SAMD9L                       | 0.173            | CDKN1A       |
| 7  | UBR5             | DDX60            | DDX60                        | 0.16             | COL1A2       |
| 8  | TUBB6            | FOXM1            | FOXM1                        | 0.155            | LGALS3BP     |
| 9  | TSPYL5           | COL6A3           | COL6A3                       | 0.141            | <b>CXCR4</b> |
| 10 | TRPV2            | IFI35            | IFI35                        | 0.072            | KIT          |
| 11 | TRIM6            | MX1              | MX1                          | <b>0.048</b>     | THBS2        |
| 12 | TRAM1            | PLOD3            | PLOD3                        | <b>0.014</b>     | KLF4         |
| 13 | TPST2            | MET              | MET                          | <b>0.013</b>     | PARP12       |
| 14 | TMEM55A          | PSMB9            | PSMB9                        | <b>0.013</b>     | IFI27        |
| 15 | TMEM255A         | TIMP1            | TIMP1                        | <b>0.013</b>     | LGALS1       |
| 16 | TMEM200B         | CDKN1A           | CDKN1A                       | <b>0.009</b>     | SPARC        |
| 17 | TMEM173          | COL1A2           | COL1A2                       | <b>0.009</b>     | DEC1         |
| 18 | TM9SF2           | LGALS3BP         | LGALS3BP                     | <b>0.009</b>     | ECM1         |
| 19 | TLCD1            | CXCR4            | CXCR4                        | <b>0.004</b>     | FERMT3       |
| 20 | THBS2            | KIT              | KIT                          | <b>0.004</b>     | MRPL13       |
| 21 | TGFBI            | THBS2            | THBS2                        | <b>0.004</b>     | PAPSS2       |
| 22 | TCIRG1           | KLF4             | KLF4                         | <b>0.002</b>     | SGK1         |
| 23 | TAP1             | PARP12           | PARP12                       | <b>0.002</b>     |              |
| 24 | SUSD5            | IFI27            | IFI27                        | <b>0.001</b>     |              |
| 25 | SSX4 /// SSX4B   | LGALS1           | LGALS1                       | <b>0.001</b>     |              |
| 26 | SRGAP2C          | SPARC            | SPARC                        | <b>0.001</b>     |              |
| 27 | SPIRE1           | DEC1             | DEC1                         | <b>&lt;0.001</b> |              |
| 28 | SPARC            | ECM1             | ECM1                         | <b>&lt;0.001</b> |              |
| 29 | SLC4A2           | FERMT3           | FERMT3                       | <b>&lt;0.001</b> |              |
| 30 | SLC45A2          | MRPL13           | MRPL13                       | <b>&lt;0.001</b> |              |
| 31 | SLC38A6          | PAPSS2           | PAPSS2                       | <b>&lt;0.001</b> |              |
| 32 | SLC2A10          | SGK1             | SGK1                         | <b>&lt;0.001</b> |              |
| 33 | SLC25A32         |                  |                              |                  |              |
| 34 | SLC1A4           |                  |                              |                  |              |
| 35 | SLC16A6          |                  |                              |                  |              |
| 36 | SGK1             |                  |                              |                  |              |
| 37 | SAMD9L           |                  |                              |                  |              |
| 38 | SACS             |                  |                              |                  |              |
| 39 | S100A4           |                  |                              |                  |              |

40 RRM2  
41 RAD54B  
42 RAD21  
43 RAB31  
44 PXDN  
45 PTRH2  
46 PTGER4  
47 PTDSS1  
48 PSMB9  
49 PRDX4  
50 PRAME  
51 PPM1K  
52 POR  
53 PLTP  
54 PLOD3  
55 PLN  
56 PIR  
57 PDLIM1  
58 PARP12  
59 PAPSS2  
60 P2RX4  
61 OTTHUMG00000174444 /// RP11-48B3.4  
62 OTTHUMG00000166315 /// RP11-1110F20.1  
63 NQO1  
64 NEURL1B  
65 NDUFAF1  
66 NBN  
67 MYEOV  
68 MX1  
69 MTERFD1  
70 MTDH  
71 MSN  
72 MRPS28  
73 MRPL13  
74 MMP12  
75 MICAL1  
76 MGST2  
77 MGLL  
78 MGC16025  
79 **MET**  
80 MED15  
81 MAN2A1

82 LY96  
83 LOC101060315 /// LOC101060683 /// NOTCH2 /// NOTCH2NL  
84 LOC100507117  
85 LOC100130872 /// SPON2  
86 LINC00622  
87 LINC00152 /// LOC541471  
88 LGALS3BP  
89 LGALS1  
90 LDLRAD3  
91 LAMC1  
92 KLF4  
93 KIT  
94 KIAA0196  
95 KDELR3  
96 IQGAP1  
97 IMPA1  
98 IFI35  
99 IFI27  
100 IFI16  
101 HTR2B  
102 HOGA1  
103 HLX  
104 HLA-DRB1 /// HLA-DRB4 /// HLA-DRB5 /// LOC100507709 /// LOC100507714  
105 HLA-DRB1 /// HLA-DRB3 /// HLA-DRB4 /// LOC100507709 /// LOC100507714  
106 HLA-DQA1 /// HLA-DQA2 /// LOC100509457  
107 HCP5  
108 GPX8  
109 GPR143  
110 GJA1  
111 GBAP1  
112 GBA /// GBAP1  
113 GALNT14  
114 FOXM1  
115 FOS  
116 FMN1  
117 FKBP11  
118 FERMT3  
119 FAM83D  
120 FAM72A /// FAM72B /// FAM72C /// FAM72D /// LOC101060656  
121 FADS1 /// MIR1908  
122 FABP5 /// LOC101060453  
123 EPDR1

124 EMP2  
125 EMC2  
126 ECM1  
127 EBAG9  
128 DUSP14  
129 DPAGT1  
130 DECR1  
131 DDX60  
132 DDX39A  
133 CYP51A1 /// LRRD1  
134 **CXCR4**  
135 CTSO  
136 CTSK  
137 CSPG4  
138 CPVL  
139 COL6A3  
140 COL4A2  
141 COL4A1  
142 COL1A2  
143 CMPK2  
144 CITED1  
145 CHSY3  
146 CHAC1  
147 CDKN1A  
148 CDC25B  
149 CD55  
150 CBR3  
151 CALHM2  
152 C8orf44-SGK3 /// SGK3  
153 C2CD2  
154 C1QB  
155 C1QA  
156 BTN3A3  
157 BACE2  
158 AZIN1  
159 ATAD2  
160 ASAP1-IT1  
161 ASAP1  
162 ARMC9  
163 ARMC1  
164 APOD  
165 ANXA4

166 AEBP1  
167 ADAM12 /// ADAM12-OT1  
168 ADAM10
